# Supplementary material for: Influence of calcination on performance of Bi–Ni–O/gamma-alumina catalyst for n-butane oxidative dehydrogenation to butadiene
Source: Royal Society of Chemistry journal article supplement (doi:10.1039/c5cy00819k), 2015-01-01
Supplement: c5cy00819k1.pdf [file c5cy00819k1.pdf]

## Influence of calcination on performance of Bi-Ni-O/gamma-alumina catalyst for *n*-butane oxidative dehydrogenation to butadiene

B. Rabindran Jermy <sup>1</sup>, S. Asaoka <sup>1</sup>, S. Al-Khattaf <sup>1,2\*</sup>

Supporting data:

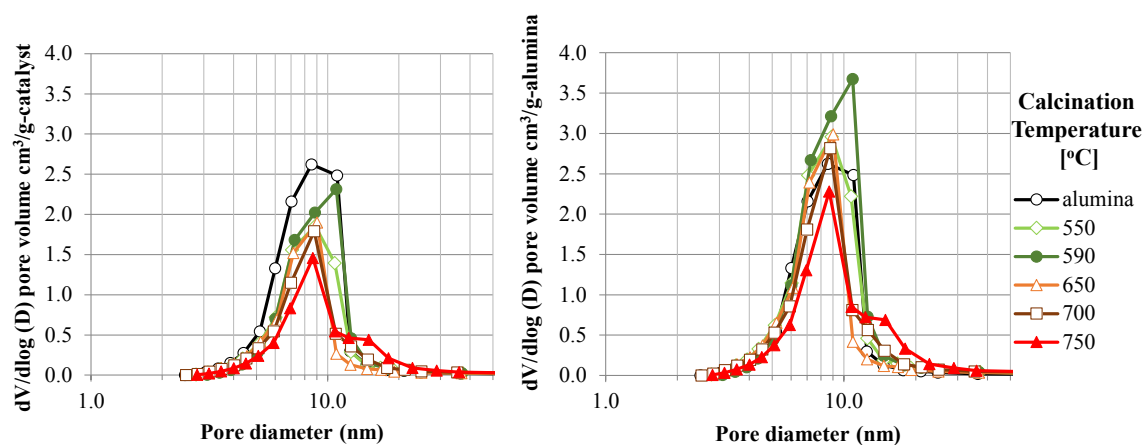

Fig. s1 Pore size distribution of catalysts with calcination temperature

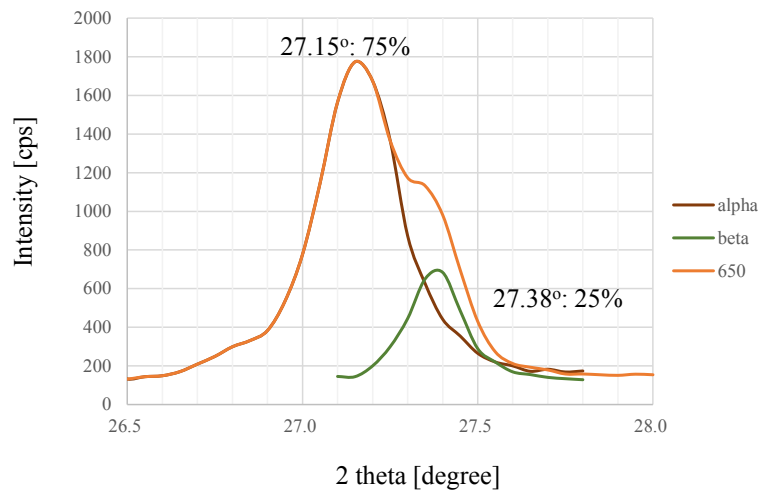

Fig.s2. XRD peak deconvolution of catalyst calcined at 650 °C

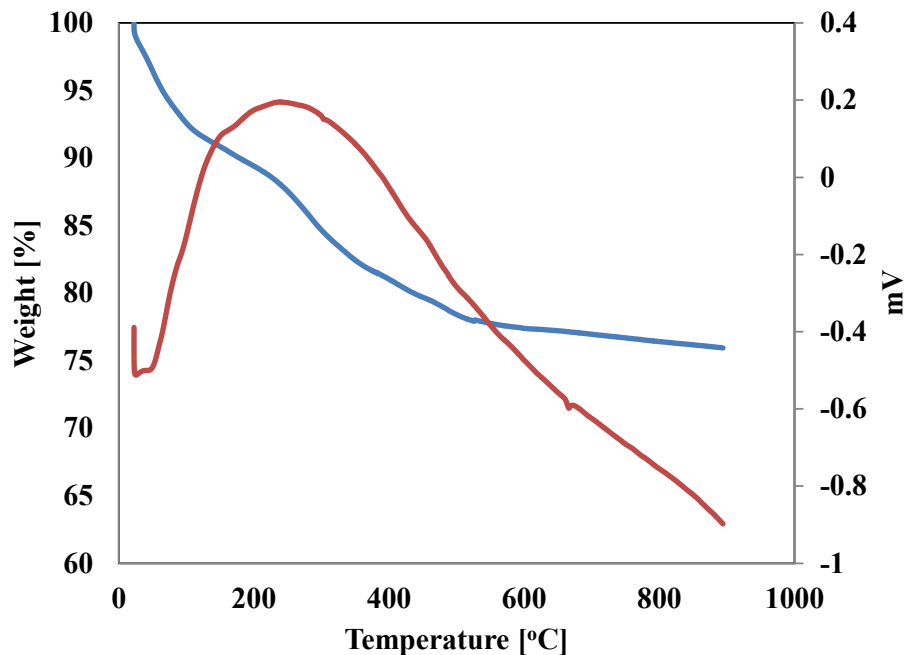

Fig. s3 TGA-DTA analysis for as-synthesized standard sample 30wt%Bi-20wt%Ni-O/Al<sub>2</sub>O<sub>3</sub>.

TGA-DTA analysis was carried out for as-synthesized standard sample 30wt%Bi-20wt%Ni-O/Al<sub>2</sub>O<sub>3</sub>. The TGA showed main weight loss occur at 250 - 350 °C (17%), and the second weight loss extends until 510 °C (5%). On the other hand, in DTA analysis, the structure change detected by XRD was not clearly observed.

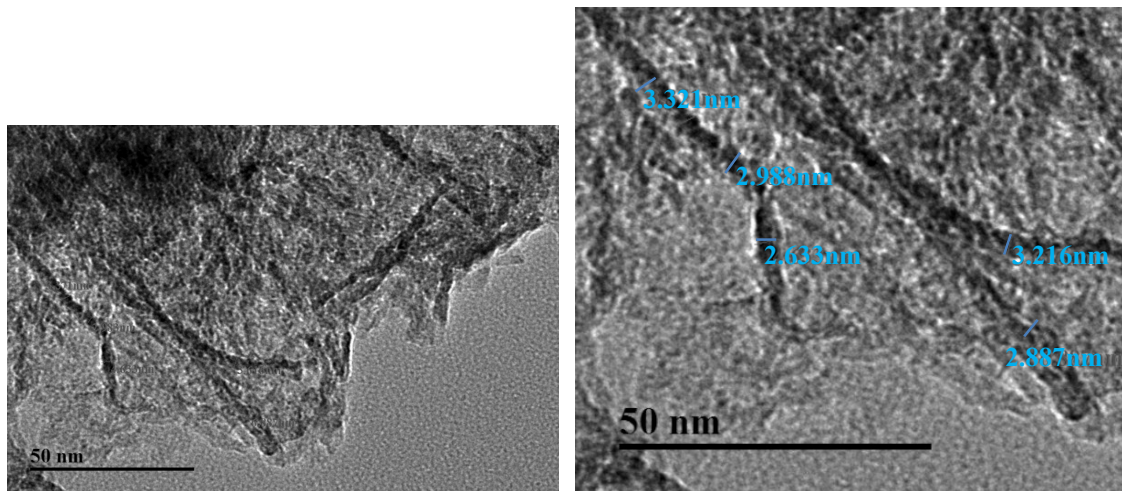

Fig. s4 TEM images of 20wt%Ni-O/Al<sub>2</sub>O<sub>3</sub> catalyst (Right: for NiO size measurement)

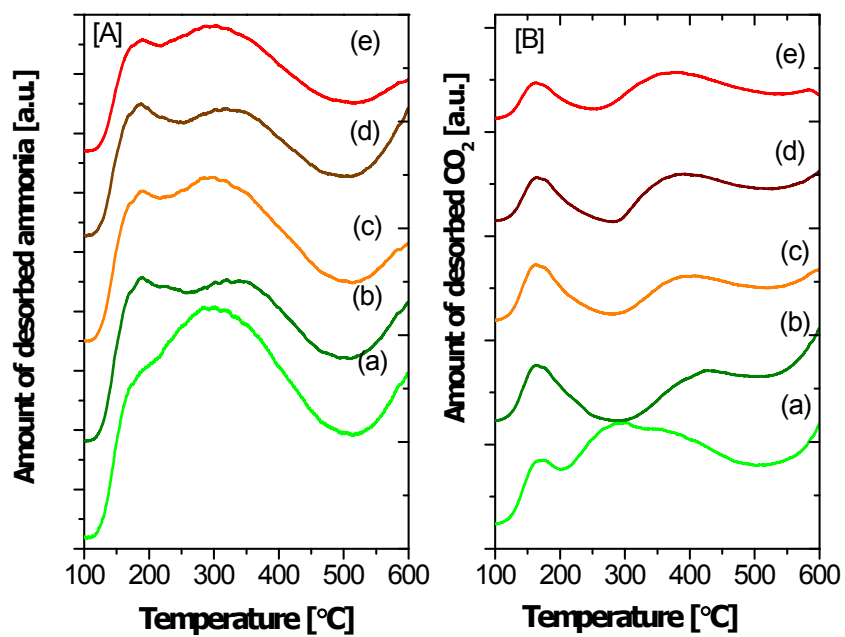

Fig. s5 TPD profile (NH<sub>3</sub> & CO<sub>2</sub>) with various calcination temperatures, (a) 550 °C, (b) 590 °C, (c) 650 °C, (d) 700 °C and (e) 750 °C.

The products found in GC with selectivity for one step and two step sample of Table 1 of manuscript is provided as supplementary table 'Table s1'.

Table s1 Products found in GC with selectivity for one step and two step sample of Table 1.

| Reaction temp. [°C]                                        | 400   |       | 400   |       | 450   |       |
|------------------------------------------------------------|-------|-------|-------|-------|-------|-------|
| O <sub>2</sub> /n-C <sub>4</sub> H <sub>10</sub> [mol/mol] | 1     |       | 2     |       | 2     |       |
| Calcination step <sup>a</sup>                              | one   | two   | one   | two   | one   | two   |
| n-C <sub>4</sub> H <sub>10</sub> conversion [%]            | 11.8  | 14.1  | 18.4  | 18.3  | 25.9  | 26.9  |
| DH selec                                                   | 66.9  | 79.8  | 58.7  | 77.5  | 54.3  | 74.8  |
| 1-C <sub>4</sub> <sup>=</sup>                              | 19.5  | 19.0  | 16.5  | 19.9  | 11.3  | 14.8  |
| t-2-C <sub>4</sub> <sup>=</sup>                            | 20.7  | 17.4  | 17.0  | 15.2  | 14.1  | 12.0  |
| c-2-C <sub>4</sub> <sup>=</sup>                            | 17.6  | 14.6  | 15.0  | 13.4  | 10.9  | 9.0   |
| BD                                                         | 9.1   | 28.8  | 10.2  | 29.0  | 18.0  | 39.0  |
| OC selec                                                   | 30.0  | 19.3  | 38.2  | 21.1  | 43.9  | 24.1  |
| Ox                                                         | 23.0  | 18.1  | 27.1  | 19.4  | 18.7  | 16.3  |
| C <sub>3</sub> <sup>=</sup>                                | 3.0   | 0.3   | 4.1   | 0.3   | 6.8   | 1.3   |
| C <sub>2</sub> <sup>=</sup>                                | 4.0   | 0.9   | 6.3   | 1.4   | 15.4  | 6.5   |
| C <sub>3</sub>                                             | 0.0   | 0.0   | 0.0   | 0.0   | 0.3   | 0.0   |
| C <sub>2</sub>                                             | 0.0   | 0.0   | 0.0   | 0.0   | 0.3   | 0.0   |
| C <sub>1</sub>                                             | 0.0   | 0.0   | 0.7   | 0.0   | 2.5   | 0.0   |
| PO selec<br>(CO)                                           | 3.0   | 0.8   | 3.2   | 1.3   | 1.8   | 1.1   |
| S <sub>sum</sub>                                           | 100.0 | 100.0 | 100.0 | 100.0 | 100.0 | 100.0 |

<sup>a</sup>one step: 590 °C-2h, two step: 350 °C-1h+590 °C-2h

<sup>b</sup> DH: dehydrogenation, BD: butadiene, OC: oxygenate and the cracked, PO: partial oxidation.

Table s2. H<sub>2</sub> consumption in TPR of 30wt%Bi-20wt%Ni-O/Al<sub>2</sub>O<sub>3</sub> catalysts calcined at various temperatures.

| Calcination Temperature (°C) | TPR                                                         |            |            |            |       |
|------------------------------|-------------------------------------------------------------|------------|------------|------------|-------|
|                              | H <sub>2</sub> consumption [m mol/g] ( T <sub>M</sub> [°C]) |            |            |            |       |
|                              | I                                                           | II         | III        | IV         | total |
| 550                          | 1.09 (500)                                                  | 1.59 (600) | 2.66 (680) | 0.26 (850) | 5.60  |
| 590                          | 0.45 (500)                                                  | 1.15 (600) | 3.18 (700) | 0.12 (850) | 4.90  |
| 650                          | 2.54 (500)                                                  | 3.43 (650) | -          | 1.16(850)  | 7.13  |
| 700                          | 2.30 (500)                                                  | 3.40(630)  | -          | 1.32 (860) | 7.02  |
| 750                          | 1.86 (500)                                                  | 3.62 (620) | -          | 1.11 (870) | 6.59  |
